# Supplementary material for: Reactivity of Nickel(II) Porphyrins in oCVD Processes—Polymerisation, Intramolecular Cyclisation and Chlorination
Source: PubMed Central journal article supplement — Chemistry. 2019 May 24;25(35):8313–20. doi: 10.1002/chem.201900793 (PMC6771558; doi:10.1002/chem.201900793), 2019-05-24
Supplement: CHEM-25-8313-s001.pdf [file CHEM-25-8313-s001.pdf]

# CHEMISTRY

## A **European** Journal

### Supporting Information

#### **Reactivity of Nickel(II) Porphyrins in oCVD Processes— Polymerisation, Intramolecular Cyclisation and Chlorination**

Giuseppe Bengasi,<sup>[a, b]</sup> Kamal Baba,<sup>[b]</sup> Oliver Back,<sup>[a]</sup> Gilles Frache,<sup>[b]</sup> Katja Heinze,<sup>\*[a]</sup> and  
Nicolas D. Boscher<sup>\*[b]</sup>

chem\_201900793\_sm\_miscellaneous\_information.pdf

## **Author Contributions**

G.B., K.B. and N.D.B. carried out the deposition experiments. G.B. performed the CV measurements and DFT calculations. G.B. and O.B. collected and analysed the EPR data. K.B. performed the UV/Vis/NIR measurements. G.F. performed the HRMS measurements. K.H. and N.D.B. designed the experiments and supervised the project. G.B., K.H. and N.D.B. wrote the manuscript with input from all authors. All authors discussed the experiments.

## Supporting Information

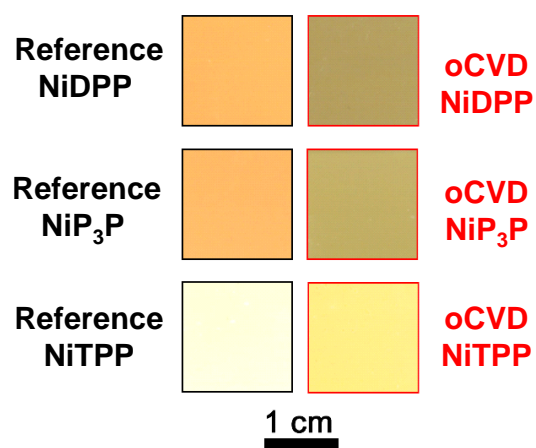

**Figure S1.** Optical images of reference and oCVD coatings of NiDPP, NiP<sub>3</sub>P and NiTPP on glass.

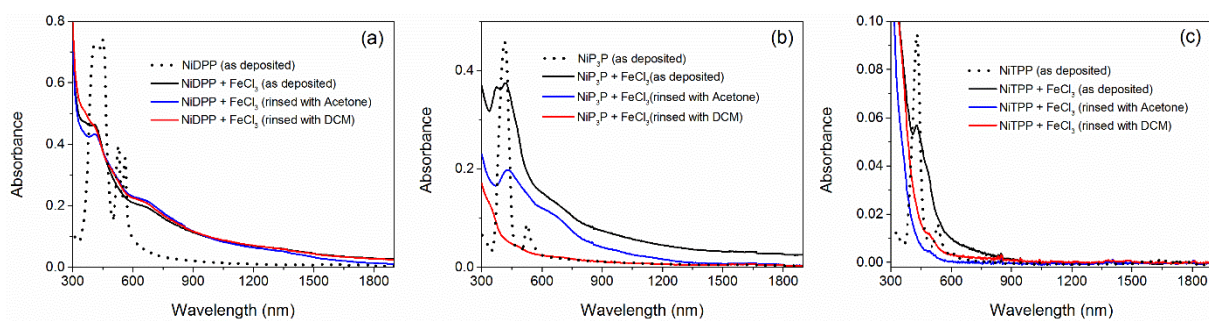

**Figure S2.** UV–Vis–NIR absorption spectra of the oCVD coatings on glass for (a) NiDPP, b) NiP<sub>3</sub>P and (c) NiTPP before (black lines) and after rinsing with acetone (blue lines) or DCM (red lines). UV–Vis–NIR absorption spectra of the porphyrins sublimed in the absence of an oxidant are provided for comparison (dashed lines).

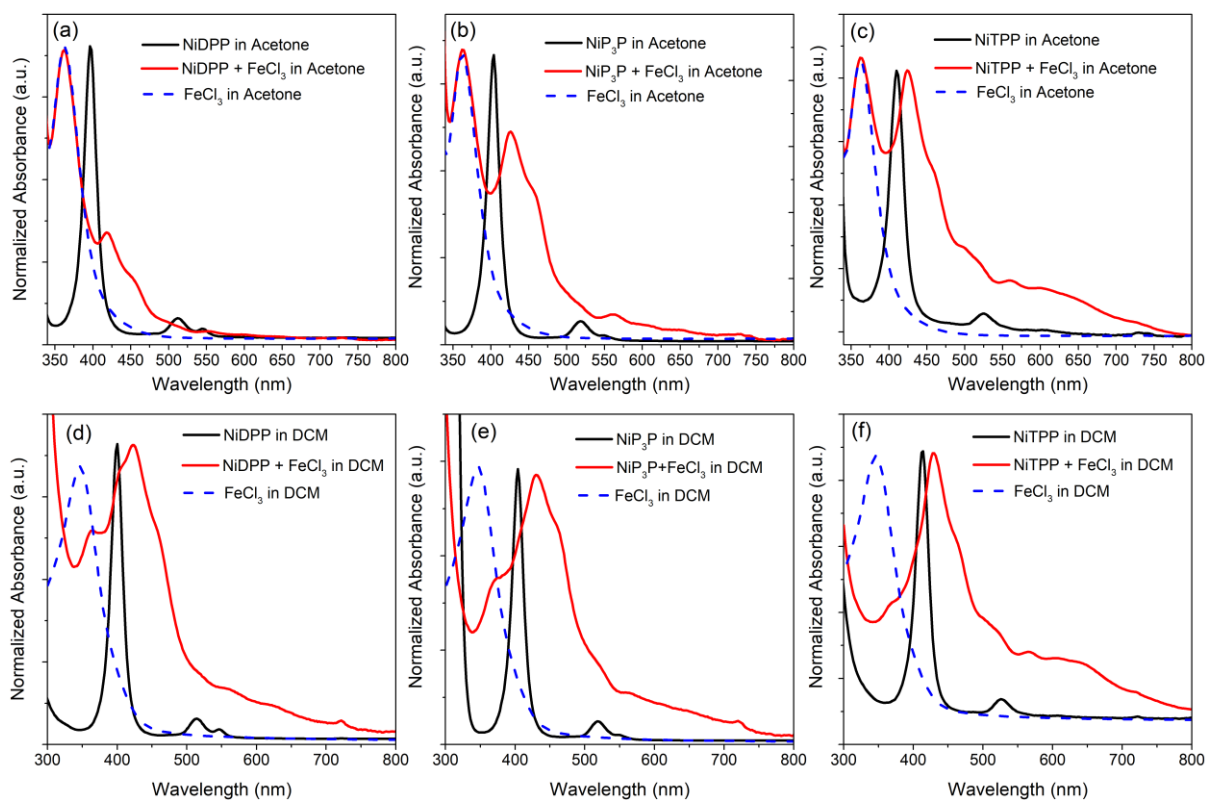

**Figure S3.** UV–Vis absorption spectra of the acetone and CH<sub>2</sub>Cl<sub>2</sub> solutions of dissolved thin films formed by the oCVD reaction of (a, d) NiDPP, (b, e) NiP<sub>3</sub>P and (c, f) NiTPP with FeCl<sub>3</sub> before and after rinsing with acetone or CH<sub>2</sub>Cl<sub>2</sub>. UV–vis absorption spectra of the dissolved sublimed porphyrins and FeCl<sub>3</sub> solutions are provided for comparison.

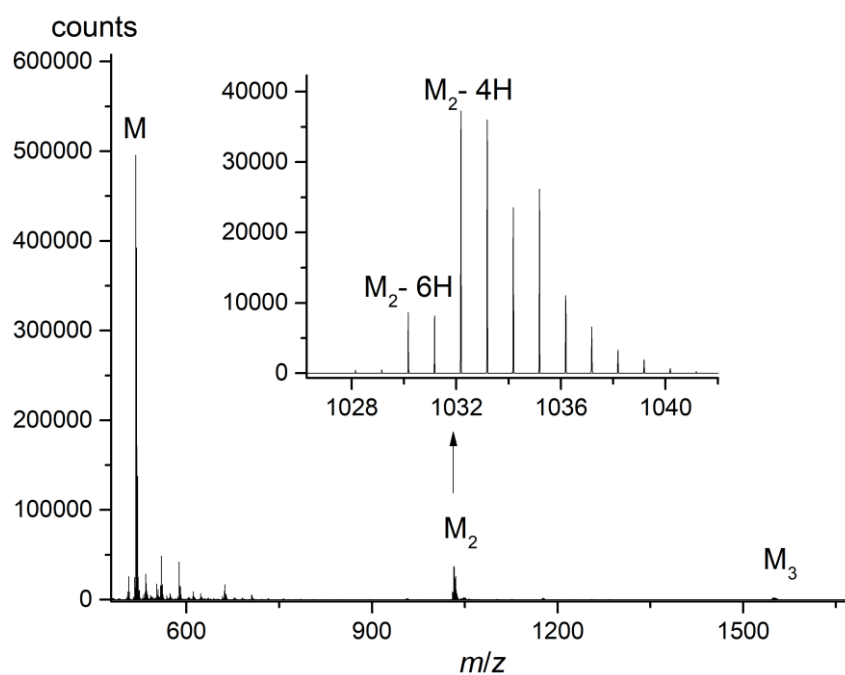

**Figure S4.** HR-MALDI mass spectrum of the NiDPP/WCl<sub>6</sub> mixture in CH<sub>2</sub>Cl<sub>2</sub> solution at the end of the EPR measurements. Matrix  $\alpha$ -cyano-4-hydroxycinnamic acid. The spectrum shows the formation of oligomers (M<sub>2</sub> – M<sub>3</sub>). Inset: The dimer region (M<sub>2</sub>) shows the sequential loss of 2H pairs.

| film                    | $\lambda(\text{CH}_2\text{Cl}_2) / \text{nm}$ | $\lambda(\text{acetone}) / \text{nm}$ |
|-------------------------|-----------------------------------------------|---------------------------------------|
| NiDPP                   | 400                                           | 397                                   |
| oCVD NiDPP              | 423                                           | 418                                   |
| NiP <sub>3</sub> P      | 404                                           | 404                                   |
| oCVD NiP <sub>3</sub> P | 430                                           | 426                                   |
| NiTPP                   | 410                                           | 410                                   |
| oCVD NiTPP              | 425                                           | 424                                   |

**Table S1.** Wavelength of the maximum absorption (Soret bands) of the washing solutions of reference and oCVD coatings (CH<sub>2</sub>Cl<sub>2</sub> and acetone).

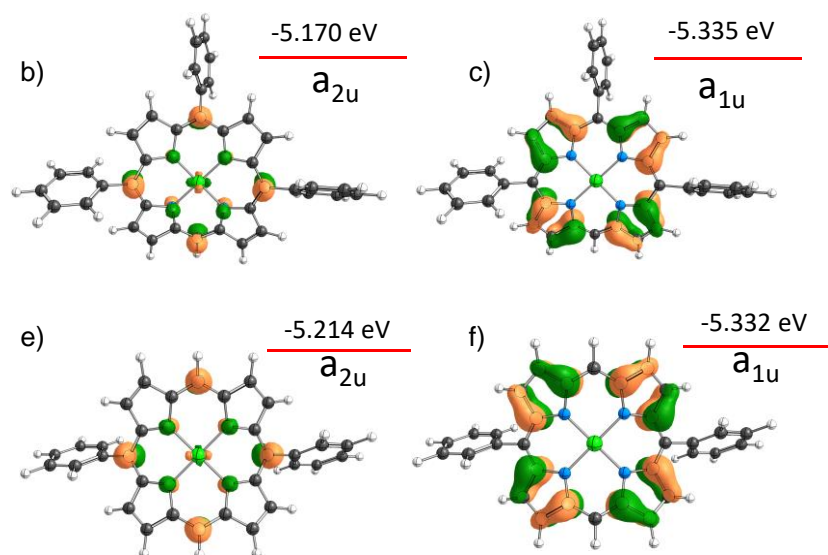

**Figure S5.** Illustration of  $a_{2u}$  and  $a_{1u}$  orbitals of NiP<sub>3</sub>P and NiDPP and their respective energies (isosurface 0.006 and 0.004 a.u.) at the RIJCOSX-BP86-D3-ZORA/def2-TZVP/CPCM(CH<sub>2</sub>Cl<sub>2</sub>) level of theory.

**Table S2.** DFT calculated Cartesian coordinates of  $[NiDPP]^{+}$  with and without solvent model.

**a)  $[NiDPP]^{+}$  with solvent model**

|    |              |              |              |
|----|--------------|--------------|--------------|
| 6  | -1.346595000 | -0.034744000 | -3.072154000 |
| 6  | -0.233812000 | 3.409784000  | 0.157009000  |
| 6  | -1.347927000 | 0.108061000  | 3.534798000  |
| 6  | -0.147391000 | -3.306689000 | 0.305490000  |
| 7  | -0.818594000 | 1.451635000  | 1.553986000  |
| 7  | -0.795238000 | 1.402209000  | -1.157976000 |
| 7  | -0.782360000 | -1.364164000 | -1.091428000 |
| 7  | -0.759832000 | -1.314119000 | 1.620498000  |
| 6  | -0.466560000 | -2.691525000 | -0.925127000 |
| 6  | -1.168749000 | -1.239060000 | -2.418869000 |
| 6  | -1.065532000 | 1.200682000  | -2.493544000 |
| 6  | -0.425097000 | 2.735692000  | -1.053748000 |
| 6  | -0.355355000 | -2.637565000 | 1.516187000  |
| 6  | -1.035020000 | -1.119678000 | 2.956138000  |
| 6  | -1.201396000 | 1.316572000  | 2.881483000  |
| 6  | -0.536853000 | 2.786539000  | 1.387655000  |
| 6  | -0.673856000 | -3.417156000 | -2.153427000 |
| 6  | -1.142132000 | -2.518786000 | -3.071523000 |
| 6  | -0.863606000 | 2.408376000  | -3.242466000 |
| 6  | -0.408451000 | 3.347420000  | -2.358449000 |
| 6  | -0.762562000 | 3.506659000  | 2.615943000  |
| 6  | -1.207440000 | 2.596589000  | 3.534158000  |
| 6  | -0.323037000 | -3.248855000 | 2.820790000  |
| 6  | -0.801641000 | -2.321744000 | 3.705018000  |
| 1  | -0.515692000 | -4.482693000 | -2.277509000 |
| 1  | -1.416478000 | -2.687316000 | -4.108784000 |
| 1  | -1.007560000 | 2.500081000  | -4.315018000 |
| 1  | -0.104605000 | 4.366619000  | -2.566915000 |
| 1  | -0.632147000 | 4.575952000  | 2.739831000  |
| 1  | -1.485694000 | 2.758181000  | 4.571445000  |
| 1  | 0.006949000  | -4.259993000 | 3.029169000  |
| 1  | -0.942778000 | -2.417243000 | 4.777607000  |
| 6  | 0.180373000  | 4.824743000  | 0.179214000  |
| 6  | -0.546007000 | 5.818622000  | -0.503986000 |
| 6  | 1.315764000  | 5.195633000  | 0.926268000  |
| 1  | -1.454491000 | 5.547849000  | -1.041433000 |
| 1  | 1.881723000  | 4.428892000  | 1.456158000  |
| 6  | -0.137467000 | 7.150043000  | -0.447873000 |
| 6  | 1.732007000  | 6.525055000  | 0.960215000  |
| 1  | -0.718954000 | 7.914505000  | -0.964044000 |
| 1  | 2.625050000  | 6.797051000  | 1.523612000  |
| 6  | 1.006143000  | 7.505848000  | 0.275210000  |
| 1  | 1.326858000  | 8.547487000  | 0.311408000  |
| 6  | 0.301379000  | -4.711068000 | 0.283568000  |
| 6  | 1.445280000  | -5.054700000 | -0.463481000 |
| 6  | -0.400766000 | -5.721846000 | 0.967242000  |
| 1  | 1.993026000  | -4.274740000 | -0.993252000 |
| 1  | -1.314994000 | -5.472526000 | 1.505285000  |
| 6  | 1.892883000  | -6.373893000 | -0.497592000 |
| 6  | 0.039215000  | -7.043226000 | 0.911019000  |
| 1  | 2.791916000  | -6.624777000 | -1.061266000 |
| 1  | -0.523928000 | -7.821189000 | 1.427359000  |
| 6  | 1.190624000  | -7.371733000 | 0.187447000  |
| 1  | 1.535835000  | -8.405495000 | 0.150522000  |
| 28 | -0.763638000 | 0.044192000  | 0.231250000  |
| 1  | -1.600607000 | -0.057360000 | -4.131331000 |
| 1  | -1.602137000 | 0.124144000  | 4.594059000  |

**b)  $[NiDPP]^{+}$  without solvent model**

|   |              |              |              |
|---|--------------|--------------|--------------|
| 6 | -1.334166000 | -0.032531000 | -3.070161000 |
| 6 | -0.227706000 | 3.412813000  | 0.158722000  |
| 6 | -1.335204000 | 0.106325000  | 3.532886000  |
| 6 | -0.142620000 | -3.309947000 | 0.303748000  |
| 7 | -0.806114000 | 1.451360000  | 1.554826000  |
| 7 | -0.784304000 | 1.403905000  | -1.157365000 |
| 7 | -0.770628000 | -1.363739000 | -1.092239000 |
| 7 | -0.749409000 | -1.315692000 | 1.619967000  |
| 6 | -0.456743000 | -2.691820000 | -0.926319000 |
| 6 | -1.156124000 | -1.238096000 | -2.419286000 |
| 6 | -1.054735000 | 1.202901000  | -2.492965000 |
| 6 | -0.417887000 | 2.737524000  | -1.052235000 |

|    |              |              |              |
|----|--------------|--------------|--------------|
| 6  | -0.349363000 | -2.639599000 | 1.514742000  |
| 6  | -1.024514000 | -1.121597000 | 2.955642000  |
| 6  | -1.188047000 | 1.316016000  | 2.881945000  |
| 6  | -0.525950000 | 2.786938000  | 1.388837000  |
| 6  | -0.664582000 | -3.416851000 | -2.154887000 |
| 6  | -1.130493000 | -2.517877000 | -3.071917000 |
| 6  | -0.854548000 | 2.412051000  | -3.240442000 |
| 6  | -0.400876000 | 3.350123000  | -2.356213000 |
| 6  | -0.751862000 | 3.506511000  | 2.617422000  |
| 6  | -1.194703000 | 2.596044000  | 3.534556000  |
| 6  | -0.316453000 | -3.251549000 | 2.818725000  |
| 6  | -0.793457000 | -2.325245000 | 3.703083000  |
| 1  | -0.510649000 | -4.483037000 | -2.276759000 |
| 1  | -1.406264000 | -2.689748000 | -4.108124000 |
| 1  | -0.995953000 | 2.507749000  | -4.312871000 |
| 1  | -0.092624000 | 4.368242000  | -2.562545000 |
| 1  | -0.624918000 | 4.576250000  | 2.739248000  |
| 1  | -1.474544000 | 2.760923000  | 4.570803000  |
| 1  | 0.017537000  | -4.261542000 | 3.024974000  |
| 1  | -0.932043000 | -2.424484000 | 4.775558000  |
| 6  | 0.176817000  | 4.830043000  | 0.179776000  |
| 6  | -0.559775000 | 5.819219000  | -0.499992000 |
| 6  | 1.311658000  | 5.211550000  | 0.922463000  |
| 1  | -1.470086000 | 5.540979000  | -1.030857000 |
| 1  | 1.887238000  | 4.449143000  | 1.448333000  |
| 6  | -0.162998000 | 7.153148000  | -0.444583000 |
| 6  | 1.717279000  | 6.543175000  | 0.953997000  |
| 1  | -0.753926000 | 7.913856000  | -0.955020000 |
| 1  | 2.611586000  | 6.822936000  | 1.511043000  |
| 6  | 0.980593000  | 7.517468000  | 0.272790000  |
| 1  | 1.292894000  | 8.561358000  | 0.307886000  |
| 6  | 0.296962000  | -4.716703000 | 0.282771000  |
| 6  | 1.440916000  | -5.070175000 | -0.459793000 |
| 6  | -0.415027000 | -5.723670000 | 0.962647000  |
| 1  | 1.997615000  | -4.293898000 | -0.985708000 |
| 1  | -1.331954000 | -5.467883000 | 1.493413000  |
| 6  | 1.879218000  | -6.391411000 | -0.491169000 |
| 6  | 0.014509000  | -7.047422000 | 0.907418000  |
| 1  | 2.780164000  | -6.649131000 | -1.048150000 |
| 1  | -0.557529000 | -7.822398000 | 1.417912000  |
| 6  | 1.166759000  | -7.383503000 | 0.190130000  |
| 1  | 1.504729000  | -8.419371000 | 0.155124000  |
| 28 | -0.750071000 | 0.044278000  | 0.231280000  |
| 1  | -1.589141000 | -0.054714000 | -4.129310000 |
| 1  | -1.590434000 | 0.122037000  | 4.592089000  |



**Table S3.** DFT calculated Cartesian coordinates of  $[\text{NiP}_3\text{P}]^+$  with and without solvent model.

**a)  $[\text{NiP}_3\text{P}]^+$  with solvent model**

|    |              |              |              |
|----|--------------|--------------|--------------|
| 6  | 0.691379072  | 0.163549108  | -3.062418591 |
| 6  | -1.186098415 | 3.496053946  | -0.072535384 |
| 6  | -0.914879200 | 0.130249042  | 3.435493844  |
| 6  | -1.042922102 | -3.245891223 | -0.085369520 |
| 7  | -0.984275504 | 1.499762938  | 1.377232475  |
| 7  | -0.292848277 | 1.509350042  | -1.264340976 |
| 7  | -0.243241085 | -1.239359576 | -1.274477366 |
| 7  | -0.913012791 | -1.242905064 | 1.360443797  |
| 6  | -0.561901570 | -2.585845794 | -1.213126672 |
| 6  | 0.337176926  | -1.055348242 | -2.517007772 |
| 6  | 0.323931090  | 1.366030322  | -2.483806133 |
| 6  | -0.634345406 | 2.862481668  | -1.181297190 |
| 6  | -1.108213049 | -2.586676603 | 1.144359030  |
| 6  | -0.929035749 | -1.082961769 | 2.750671807  |
| 6  | -1.035959188 | 1.337508726  | 2.752190017  |
| 6  | -1.271747340 | 2.835329583  | 1.153943489  |
| 6  | -0.211913263 | -3.240081386 | -2.460536093 |
| 6  | 0.389746452  | -2.306384114 | -3.242014470 |
| 6  | 0.408520603  | 2.645785172  | -3.165833055 |
| 6  | -0.215504260 | 3.558568301  | -2.376522854 |
| 6  | -1.550808433 | 3.508082674  | 2.412007364  |
| 6  | -1.346254439 | 2.601865048  | 3.397880983  |
| 6  | -1.258072871 | -3.282444671 | 2.412940832  |
| 6  | -1.114627736 | -2.357261331 | 3.397988406  |
| 1  | -0.397004118 | -4.285707584 | -2.679979548 |
| 1  | 0.801697711  | -2.416057157 | -4.240935484 |
| 1  | 0.877140924  | 2.789470554  | -4.135271488 |
| 1  | -0.359113969 | 4.619292454  | -2.550067062 |
| 1  | -1.833286953 | 4.550913229  | 2.502841697  |
| 1  | -1.423220094 | 2.742328799  | 4.470240157  |
| 1  | -1.424878007 | -4.349839103 | 2.510241182  |
| 1  | -1.158713492 | -2.501537804 | 4.471712328  |
| 6  | -1.564747491 | 4.930406872  | -0.180128760 |
| 6  | -2.672264673 | 5.298140609  | -0.958827370 |
| 6  | -0.815830448 | 5.925384457  | 0.466279770  |
| 1  | -3.254796747 | 4.525430698  | -1.462249562 |
| 1  | 0.059468410  | 5.644328894  | 1.053311968  |
| 6  | -3.031757003 | 6.642569915  | -1.079435332 |
| 6  | -1.175865185 | 7.268603535  | 0.341110301  |
| 1  | -3.898273636 | 6.917869087  | -1.681579244 |
| 1  | -0.583898410 | 8.035229495  | 0.842233747  |
| 6  | -2.285440337 | 7.629504535  | -0.429446388 |
| 1  | -2.565849774 | 8.678966209  | -0.525399982 |
| 6  | -1.385452714 | -4.690267295 | -0.141588252 |
| 6  | -0.407191839 | -5.660054455 | -0.411450128 |
| 6  | -2.706065869 | -5.097305672 | 0.106342931  |
| 1  | 0.625466870  | -5.350859363 | -0.577302216 |
| 1  | -3.468409727 | -4.345351680 | 0.315500768  |
| 6  | -0.747594100 | -7.014067690 | -0.441244395 |
| 6  | -3.044176264 | -6.452057639 | 0.072597827  |
| 1  | 0.021894180  | -7.759792736 | -0.644727864 |
| 1  | -4.074624071 | -6.756251476 | 0.259647697  |
| 6  | -2.066422340 | -7.412745596 | -0.202208152 |
| 1  | -2.330433103 | -8.470710620 | -0.226011603 |
| 28 | -0.608012488 | 0.131854037  | 0.050201458  |
| 1  | 1.161077327  | 0.179586354  | -4.044024396 |
| 6  | -0.895887557 | 0.112615269  | 4.923752468  |
| 6  | -2.046817911 | 0.421011303  | 5.664023813  |
| 6  | 0.284191996  | -0.237489987 | 5.596058933  |
| 6  | -2.014067660 | 0.386806873  | 7.059889148  |
| 6  | 0.314199521  | -0.268697686 | 6.992530705  |
| 6  | -0.833671130 | 0.044039718  | 7.726398477  |
| 1  | -2.971360945 | 0.673407154  | 5.142966260  |
| 1  | 1.178874616  | -0.478681568 | 5.020371238  |
| 1  | -2.915019973 | 0.623556011  | 7.627030631  |
| 1  | 1.237916510  | -0.536159214 | 7.506902104  |
| 1  | -0.809564460 | 0.018090983  | 8.816402537  |

**b)  $[\text{NiP}_3\text{P}]^+$  without solvent model**

|   |              |             |              |
|---|--------------|-------------|--------------|
| 6 | -6.505044000 | 2.565616000 | -1.316637000 |
| 6 | -2.722732000 | 4.600981000 | 0.934035000  |

|    |               |              |              |
|----|---------------|--------------|--------------|
| 6  | -2.377187000  | 0.414462000  | 3.406326000  |
| 6  | -7.180790000  | -0.060902000 | 2.700212000  |
| 7  | -2.938170000  | 2.407195000  | 2.056271000  |
| 7  | -4.624698000  | 3.269496000  | 0.087894000  |
| 7  | -6.462389000  | 1.341371000  | 0.808382000  |
| 7  | -4.759264000  | 0.473191000  | 2.741717000  |
| 6  | -7.421285000  | 0.623766000  | 1.500396000  |
| 6  | -7.057416000  | 1.695361000  | -0.384598000 |
| 6  | -5.390088000  | 3.346141000  | -1.064231000 |
| 6  | -3.788822000  | 4.361440000  | 0.046151000  |
| 6  | -5.875668000  | -0.190082000 | 3.211062000  |
| 6  | -3.682305000  | -0.096983000 | 3.396335000  |
| 6  | -2.077725000  | 1.668072000  | 2.845097000  |
| 6  | -2.293807000  | 3.615229000  | 1.832429000  |
| 6  | -8.648255000  | 0.578510000  | 0.747264000  |
| 6  | -8.400787000  | 1.192750000  | -0.448719000 |
| 6  | -4.995492000  | 4.478795000  | -1.855239000 |
| 6  | -4.024036000  | 5.131166000  | -1.149859000 |
| 6  | -1.039406000  | 3.642707000  | 2.534366000  |
| 6  | -0.873099000  | 2.410060000  | 3.099307000  |
| 6  | -5.493573000  | -1.189409000 | 4.172194000  |
| 6  | -4.130771000  | -1.151159000 | 4.265843000  |
| 1  | -9.572218000  | 0.126284000  | 1.087741000  |
| 1  | -9.079354000  | 1.342585000  | -1.283197000 |
| 1  | -5.432955000  | 4.748805000  | -2.811792000 |
| 1  | -3.479949000  | 6.027941000  | -1.424079000 |
| 1  | -0.359695000  | 4.485840000  | 2.565230000  |
| 1  | -0.020850000  | 2.043149000  | 3.658574000  |
| 1  | -6.182233000  | -1.856123000 | 4.678725000  |
| 1  | -3.483895000  | -1.750186000 | 4.896811000  |
| 6  | -1.989761000  | 5.876761000  | 0.806794000  |
| 6  | -2.682392000  | 7.087426000  | 0.996266000  |
| 6  | -0.625344000  | 5.915482000  | 0.465215000  |
| 1  | -3.740196000  | 7.062289000  | 1.260240000  |
| 1  | -0.095114000  | 4.984333000  | 0.265215000  |
| 6  | -2.016280000  | 8.305440000  | 0.879876000  |
| 6  | 0.030303000   | 7.137204000  | 0.327914000  |
| 1  | -2.557586000  | 9.236013000  | 1.051325000  |
| 1  | 1.082032000   | 7.156199000  | 0.041591000  |
| 6  | -0.659458000  | 8.333796000  | 0.544169000  |
| 1  | -0.141919000  | 9.287885000  | 0.443011000  |
| 6  | -8.275009000  | -0.763762000 | 3.397685000  |
| 6  | -9.042955000  | -1.754432000 | 2.757792000  |
| 6  | -8.540139000  | -0.456599000 | 4.746013000  |
| 1  | -8.810449000  | -2.034456000 | 1.730402000  |
| 1  | -7.949051000  | 0.311989000  | 5.244940000  |
| 6  | -10.056418000 | -2.413746000 | 3.449938000  |
| 6  | -9.569862000  | -1.103032000 | 5.425980000  |
| 1  | -10.630478000 | -3.195121000 | 2.951561000  |
| 1  | -9.781343000  | -0.840482000 | 6.462665000  |
| 6  | -10.329111000 | -2.083748000 | 4.780975000  |
| 1  | -11.128203000 | -2.595873000 | 5.317229000  |
| 28 | -4.700662000  | 1.881169000  | 1.432415000  |
| 1  | -7.052538000  | 2.738186000  | -2.242812000 |
| 6  | -1.335366000  | -0.349684000 | 4.124311000  |
| 6  | -0.687240000  | 0.169066000  | 5.259534000  |
| 6  | -1.007193000  | -1.643627000 | 3.679032000  |
| 6  | 0.273353000   | -0.588244000 | 5.926891000  |
| 6  | -0.030181000  | -2.387833000 | 4.337475000  |
| 6  | 0.611263000   | -1.863190000 | 5.462974000  |
| 1  | -0.971183000  | 1.150688000  | 5.639286000  |
| 1  | -1.508040000  | -2.048958000 | 2.799206000  |
| 1  | 0.754468000   | -0.185479000 | 6.818427000  |
| 1  | 0.231181000   | -3.380670000 | 3.970916000  |
| 1  | 1.368875000   | -2.449840000 | 5.982792000  |

**Table S4.** DFT calculated Cartesian coordinates of NiDPP with and without solvent model.

**a) NiDPP with solvent model**

|    |              |              |              |
|----|--------------|--------------|--------------|
| 6  | -1.129697000 | -0.013433000 | -3.108884000 |
| 6  | -0.224672000 | 3.439840000  | 0.176873000  |
| 6  | -1.132554000 | 0.092367000  | 3.571466000  |
| 6  | -0.140471000 | -3.337211000 | 0.286132000  |
| 7  | -0.686294000 | 1.447754000  | 1.569949000  |
| 7  | -0.677622000 | 1.408261000  | -1.154099000 |
| 7  | -0.650336000 | -1.357433000 | -1.107315000 |
| 7  | -0.644335000 | -1.317633000 | 1.616860000  |
| 6  | -0.377480000 | -2.705811000 | -0.933505000 |
| 6  | -0.949312000 | -1.217300000 | -2.454406000 |
| 6  | -0.921374000 | 1.212067000  | -2.504055000 |
| 6  | -0.393978000 | 2.762415000  | -1.028378000 |
| 6  | -0.326904000 | -2.664201000 | 1.491311000  |
| 6  | -0.893406000 | -1.127527000 | 2.966713000  |
| 6  | -0.982016000 | 1.300286000  | 2.916952000  |
| 6  | -0.446333000 | 2.802771000  | 1.396397000  |
| 6  | -0.507610000 | -3.408386000 | -2.186786000 |
| 6  | -0.949312000 | -2.490614000 | -3.120313000 |
| 6  | -0.792239000 | 2.448282000  | -3.227339000 |
| 6  | -0.421351000 | 3.399823000  | -2.321988000 |
| 6  | -0.594389000 | 3.501826000  | 2.649650000  |
| 6  | -0.957626000 | 2.574721000  | 3.582908000  |
| 6  | -0.338382000 | -3.301950000 | 2.784991000  |
| 6  | -0.733348000 | -2.360015000 | 3.690169000  |
| 1  | -0.350416000 | -4.474536000 | -2.312463000 |
| 1  | -1.099472000 | -2.639506000 | -4.176772000 |
| 1  | -0.932685000 | 2.548270000  | -4.300222000 |
| 1  | -0.203505000 | 4.447766000  | -2.497918000 |
| 1  | -0.463566000 | 4.571522000  | 2.775330000  |
| 1  | -1.167822000 | 2.718412000  | 4.639319000  |
| 1  | -0.094160000 | -4.343998000 | 2.961213000  |
| 1  | -0.871429000 | -2.463433000 | 4.763022000  |
| 6  | 0.095237000  | 4.893203000  | 0.177329000  |
| 6  | -0.824752000 | 5.839269000  | -0.301612000 |
| 6  | 1.326417000  | 5.338106000  | 0.684239000  |
| 1  | -1.790801000 | 5.501445000  | -0.679176000 |
| 1  | 2.044081000  | 4.606763000  | 1.059141000  |
| 6  | -0.516630000 | 7.201278000  | -0.280144000 |
| 6  | 1.635412000  | 6.700195000  | 0.702904000  |
| 1  | -1.243606000 | 7.925849000  | -0.649766000 |
| 1  | 2.598466000  | 7.031043000  | 1.094283000  |
| 6  | 0.715011000  | 7.635357000  | 0.220049000  |
| 1  | 0.955431000  | 8.699216000  | 0.235923000  |
| 6  | 0.216125000  | -4.781952000 | 0.285600000  |
| 6  | 1.456852000  | -5.195752000 | -0.224488000 |
| 6  | -0.678176000 | -5.750944000 | 0.767410000  |
| 1  | 2.154582000  | -4.446673000 | -0.602004000 |
| 1  | -1.651542000 | -5.437729000 | 1.147367000  |
| 6  | 1.800244000  | -6.549534000 | -0.243615000 |
| 6  | -0.335582000 | -7.104691000 | 0.745672000  |
| 1  | 2.770241000  | -6.856008000 | -0.637676000 |
| 1  | -1.042780000 | -7.847227000 | 1.118010000  |
| 6  | 0.905259000  | -7.507584000 | 0.242157000  |
| 1  | 1.172478000  | -8.565022000 | 0.225509000  |
| 28 | -0.664660000 | 0.045329000  | 0.231387000  |
| 1  | -1.333859000 | -0.033005000 | -4.178674000 |
| 1  | -1.337470000 | 0.106910000  | 4.641206000  |

**b) NiDPP without solvent model**

|   |              |              |              |
|---|--------------|--------------|--------------|
| 6 | -1.112116000 | -0.012657000 | -3.107197000 |
| 6 | -0.221473000 | 3.439322000  | 0.176975000  |
| 6 | -1.113042000 | 0.092083000  | 3.569912000  |
| 6 | -0.136390000 | -3.336478000 | 0.285640000  |
| 7 | -0.676619000 | 1.447865000  | 1.570069000  |
| 7 | -0.662649000 | 1.408832000  | -1.155399000 |
| 7 | -0.641463000 | -1.357046000 | -1.107412000 |
| 7 | -0.628243000 | -1.317684000 | 1.618045000  |
| 6 | -0.374749000 | -2.705500000 | -0.933244000 |
| 6 | -0.939342000 | -1.216745000 | -2.452727000 |
| 6 | -0.900541000 | 1.212670000  | -2.504555000 |
| 6 | -0.381495000 | 2.761426000  | -1.028476000 |

|    |              |              |              |
|----|--------------|--------------|--------------|
| 6  | -0.313208000 | -2.662792000 | 1.491107000  |
| 6  | -0.870826000 | -1.127536000 | 2.967232000  |
| 6  | -0.970651000 | 1.300131000  | 2.915426000  |
| 6  | -0.443788000 | 2.802578000  | 1.395884000  |
| 6  | -0.509649000 | -3.409747000 | -2.184813000 |
| 6  | -0.890306000 | -2.490982000 | -3.117759000 |
| 6  | -0.766794000 | 2.448227000  | -3.227511000 |
| 6  | -0.401019000 | 3.399853000  | -2.321730000 |
| 6  | -0.596063000 | 3.503210000  | 2.647485000  |
| 6  | -0.953439000 | 2.575189000  | 3.580476000  |
| 6  | -0.316485000 | -3.301467000 | 2.784385000  |
| 6  | -0.705936000 | -2.359318000 | 3.690198000  |
| 1  | -0.359533000 | -4.477148000 | -2.306048000 |
| 1  | -1.097997000 | -2.641608000 | -4.173426000 |
| 1  | -0.899367000 | 2.549307000  | -4.301058000 |
| 1  | -0.178749000 | 4.447143000  | -2.494198000 |
| 1  | -0.472670000 | 4.574031000  | 2.768701000  |
| 1  | -1.164628000 | 2.720538000  | 4.636190000  |
| 1  | -0.067910000 | -4.342822000 | 2.956879000  |
| 1  | -0.835768000 | -2.463668000 | 4.763768000  |
| 6  | 0.087820000  | 4.894519000  | 0.177723000  |
| 6  | -0.837696000 | 5.833779000  | -0.302719000 |
| 6  | 1.313519000  | 5.351141000  | 0.685634000  |
| 1  | -1.800008000 | 5.485631000  | -0.680009000 |
| 1  | 2.034655000  | 4.624201000  | 1.061674000  |
| 6  | -0.540515000 | 7.197422000  | -0.282738000 |
| 6  | 1.610964000  | 6.714889000  | 0.704698000  |
| 1  | -1.272689000 | 7.916028000  | -0.653666000 |
| 1  | 2.570686000  | 7.053914000  | 1.097072000  |
| 6  | 0.685359000  | 7.641704000  | 0.219237000  |
| 1  | 0.917157000  | 8.707363000  | 0.234810000  |
| 6  | 0.209230000  | -4.783469000 | 0.284891000  |
| 6  | 1.445811000  | -5.209297000 | -0.223434000 |
| 6  | -0.692277000 | -5.745581000 | 0.765754000  |
| 1  | 2.148384000  | -4.464572000 | -0.599826000 |
| 1  | -1.662900000 | -5.421660000 | 1.143343000  |
| 6  | 1.777323000  | -6.565162000 | -0.242470000 |
| 6  | -0.361030000 | -7.101352000 | 0.745793000  |
| 1  | 2.745096000  | -6.880081000 | -0.635160000 |
| 1  | -1.074832000 | -7.838043000 | 1.117054000  |
| 6  | 0.875409000  | -7.514829000 | 0.243416000  |
| 1  | 1.133828000  | -8.574348000 | 0.227879000  |
| 28 | -0.651601000 | 0.045495000  | 0.231326000  |
| 1  | -1.314764000 | -0.032617000 | -4.177284000 |
| 1  | -1.315974000 | 0.106950000  | 4.640027000  |

**Table S5. DFT calculated Cartesian coordinates for NiP<sub>3</sub>P with and without solvent model.**

**a) NiP<sub>3</sub>P with solvent model**

|    |              |              |              |
|----|--------------|--------------|--------------|
| 6  | 1.139151000  | 0.041590000  | -2.861041000 |
| 6  | -0.410280000 | 3.383470000  | 0.294563000  |
| 6  | 0.139993000  | 0.002204000  | 3.757118000  |
| 6  | -0.347497000 | -3.358217000 | 0.261399000  |
| 7  | -0.095671000 | 1.383779000  | 1.719371000  |
| 7  | 0.327745000  | 1.400949000  | -0.981766000 |
| 7  | 0.361771000  | -1.356996000 | -0.994419000 |
| 7  | -0.053171000 | -1.362505000 | 1.701744000  |
| 6  | 0.039927000  | -2.704703000 | -0.905498000 |
| 6  | 0.835132000  | -1.178235000 | -2.284148000 |
| 6  | 0.839008000  | 1.250729000  | -2.261587000 |
| 6  | 0.007641000  | 2.745167000  | -0.870712000 |
| 6  | -0.307422000 | -2.711222000 | 1.496867000  |
| 6  | 0.053201000  | -1.210766000 | 3.077143000  |
| 6  | -0.013723000 | 1.218796000  | 3.096014000  |
| 6  | -0.384808000 | 2.728732000  | 1.525316000  |
| 6  | 0.281587000  | -3.358543000 | -2.168500000 |
| 6  | 0.818523000  | -2.422983000 | -3.005004000 |
| 6  | 0.865619000  | 2.516204000  | -2.945876000 |
| 6  | 0.318354000  | 3.435992000  | -2.098851000 |
| 6  | -0.518164000 | 3.395989000  | 2.794599000  |
| 6  | -0.234456000 | 2.476226000  | 3.761782000  |
| 6  | -0.370613000 | -3.402608000 | 2.759035000  |
| 6  | -0.114869000 | -2.481746000 | 3.733159000  |
| 1  | 0.082096000  | -4.405486000 | -2.370246000 |
| 1  | 1.141179000  | -2.538479000 | -4.036186000 |
| 1  | 1.234235000  | 2.657953000  | -3.958206000 |
| 1  | 0.162561000  | 4.497094000  | -2.263616000 |
| 1  | -0.765299000 | 4.444648000  | 2.919626000  |
| 1  | -0.205850000 | 2.620905000  | 4.836327000  |
| 1  | -0.557494000 | -4.465490000 | 2.870619000  |
| 1  | -0.072741000 | -2.631560000 | 4.806903000  |
| 6  | -0.778349000 | 4.824269000  | 0.223677000  |
| 6  | -1.955882000 | 5.210964000  | -0.435059000 |
| 6  | 0.044902000  | 5.814231000  | 0.782817000  |
| 1  | -2.597310000 | 4.445157000  | -0.873868000 |
| 1  | 0.971324000  | 5.521926000  | 1.279104000  |
| 6  | -2.308841000 | 6.559667000  | -0.523882000 |
| 6  | -0.307031000 | 7.162695000  | 0.691722000  |
| 1  | -3.230031000 | 6.845067000  | -1.033876000 |
| 1  | 0.345005000  | 7.921927000  | 1.125967000  |
| 6  | -1.485875000 | 7.539023000  | 0.040290000  |
| 1  | -1.760411000 | 8.592385000  | -0.029995000 |
| 6  | -0.706722000 | -4.801770000 | 0.224904000  |
| 6  | 0.247913000  | -5.781785000 | -0.089680000 |
| 6  | -2.016841000 | -5.202477000 | 0.531524000  |
| 1  | 1.272742000  | -5.479225000 | -0.309024000 |
| 1  | -2.761809000 | -4.444777000 | 0.779186000  |
| 6  | -0.102765000 | -7.133579000 | -0.104556000 |
| 6  | -2.367751000 | -6.554294000 | 0.514160000  |
| 1  | 0.650962000  | -7.884703000 | -0.345092000 |
| 1  | -3.391100000 | -6.850334000 | 0.749182000  |
| 6  | -1.411840000 | -7.523530000 | 0.195069000  |
| 1  | -1.685071000 | -8.579507000 | 0.183491000  |
| 28 | 0.134590000  | 0.016737000  | 0.361785000  |
| 1  | 1.518849000  | 0.050548000  | -3.881941000 |
| 6  | 0.286105000  | -0.023554000 | 5.239147000  |
| 6  | -0.782605000 | 0.322038000  | 6.080661000  |
| 6  | 1.503359000  | -0.421759000 | 5.812777000  |
| 6  | -0.634041000 | 0.277243000  | 7.468709000  |
| 6  | 1.652239000  | -0.464598000 | 7.201195000  |
| 6  | 0.584246000  | -0.114298000 | 8.032679000  |
| 1  | -1.736837000 | 0.615219000  | 5.640705000  |
| 1  | 2.335737000  | -0.694437000 | 5.162207000  |
| 1  | -1.474458000 | 0.543851000  | 8.111163000  |
| 1  | 2.605744000  | -0.771077000 | 7.633650000  |
| 1  | 0.699717000  | -0.149110000 | 9.116806000  |

**b) NiP<sub>3</sub>P no solvent model**

|   |              |             |              |
|---|--------------|-------------|--------------|
| 6 | 1.099828000  | 0.040061000 | -2.871735000 |
| 6 | -0.409437000 | 3.383704000 | 0.294678000  |

|    |              |              |              |
|----|--------------|--------------|--------------|
| 6  | 0.134336000  | 0.002285000  | 3.751866000  |
| 6  | -0.348069000 | -3.358967000 | 0.262900000  |
| 7  | -0.099780000 | 1.384040000  | 1.716699000  |
| 7  | 0.309477000  | 1.400733000  | -0.988183000 |
| 7  | 0.341549000  | -1.358101000 | -1.000826000 |
| 7  | -0.057294000 | -1.363139000 | 1.699554000  |
| 6  | 0.026304000  | -2.705117000 | -0.907244000 |
| 6  | 0.801891000  | -1.179655000 | -2.293369000 |
| 6  | 0.808020000  | 1.249667000  | -2.270952000 |
| 6  | -0.003577000 | 2.744632000  | -0.873673000 |
| 6  | -0.306491000 | -2.711573000 | 1.496963000  |
| 6  | 0.049444000  | -1.210678000 | 3.073187000  |
| 6  | -0.016858000 | 1.218703000  | 3.091413000  |
| 6  | -0.382965000 | 2.728703000  | 1.524274000  |
| 6  | 0.257645000  | -3.361169000 | -2.170927000 |
| 6  | 0.782168000  | -2.425055000 | -3.012785000 |
| 6  | 0.833348000  | 2.515296000  | -2.954730000 |
| 6  | 0.298809000  | 3.436555000  | -2.103231000 |
| 6  | -0.511696000 | 3.397197000  | 2.793703000  |
| 6  | -0.231046000 | 2.476454000  | 3.759312000  |
| 6  | -0.365717000 | -3.403410000 | 2.759429000  |
| 6  | -0.113634000 | -2.481442000 | 3.731692000  |
| 1  | 0.055921000  | -4.408517000 | -2.366853000 |
| 1  | 1.092657000  | -2.541773000 | -4.047337000 |
| 1  | 1.192680000  | 2.657880000  | -3.970047000 |
| 1  | 0.146485000  | 4.498736000  | -2.262166000 |
| 1  | -0.756186000 | 4.446571000  | 2.915835000  |
| 1  | -0.197016000 | 2.617381000  | 4.833988000  |
| 1  | -0.546880000 | -4.467300000 | 2.868317000  |
| 1  | -0.070234000 | -2.626610000 | 4.805756000  |
| 6  | -0.763924000 | 4.827704000  | 0.228265000  |
| 6  | -1.942307000 | 5.229747000  | -0.418223000 |
| 6  | 0.074213000  | 5.808943000  | 0.779463000  |
| 1  | -2.594532000 | 4.469889000  | -0.850860000 |
| 1  | 1.001614000  | 5.503114000  | 1.265366000  |
| 6  | -2.280411000 | 6.581521000  | -0.503440000 |
| 6  | -0.263368000 | 7.160535000  | 0.693694000  |
| 1  | -3.202975000 | 6.877977000  | -1.004396000 |
| 1  | 0.401222000  | 7.912226000  | 1.121870000  |
| 6  | -1.442659000 | 7.550629000  | 0.053732000  |
| 1  | -1.705982000 | 8.606921000  | -0.013333000 |
| 6  | -0.693059000 | -4.805755000 | 0.229198000  |
| 6  | 0.272144000  | -5.776807000 | -0.078647000 |
| 6  | -1.998674000 | -5.221724000 | 0.531169000  |
| 1  | 1.293661000  | -5.460553000 | -0.293592000 |
| 1  | -2.751036000 | -4.469950000 | 0.773466000  |
| 6  | -0.063047000 | -7.131657000 | -0.092321000 |
| 6  | -2.334145000 | -6.576568000 | 0.516663000  |
| 1  | 0.699846000  | -7.875239000 | -0.327145000 |
| 1  | -3.354980000 | -6.883698000 | 0.747994000  |
| 6  | -1.367594000 | -7.535393000 | 0.203373000  |
| 1  | -1.629028000 | -8.594227000 | 0.193113000  |
| 28 | 0.123065000  | 0.016258000  | 0.357544000  |
| 1  | 1.469593000  | 0.048716000  | -3.896300000 |
| 6  | 0.273497000  | -0.022590000 | 5.234158000  |
| 6  | -0.800505000 | 0.317866000  | 6.070242000  |
| 6  | 1.487622000  | -0.414779000 | 5.816792000  |
| 6  | -0.660411000 | 0.274829000  | 7.458357000  |
| 6  | 1.627975000  | -0.457524000 | 7.205158000  |
| 6  | 0.554783000  | -0.111462000 | 8.029736000  |
| 1  | -1.752117000 | 0.605764000  | 5.621516000  |
| 1  | 2.323555000  | -0.683414000 | 5.169490000  |
| 1  | -1.505937000 | 0.537087000  | 8.095820000  |
| 1  | 2.579963000  | -0.759800000 | 7.643685000  |
| 1  | 0.663786000  | -0.145660000 | 9.114418000  |
